# Supplementary material
Source: PubMed Central journal article supplement (PMC2871077)

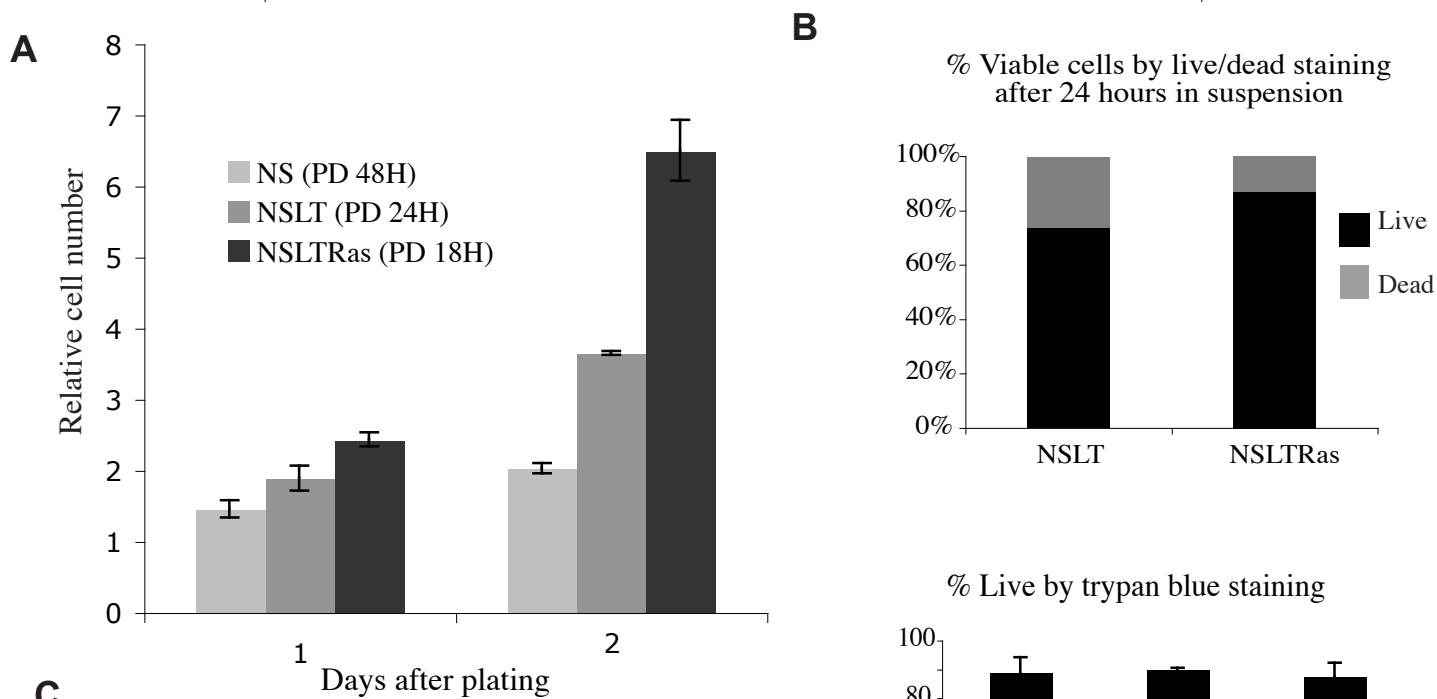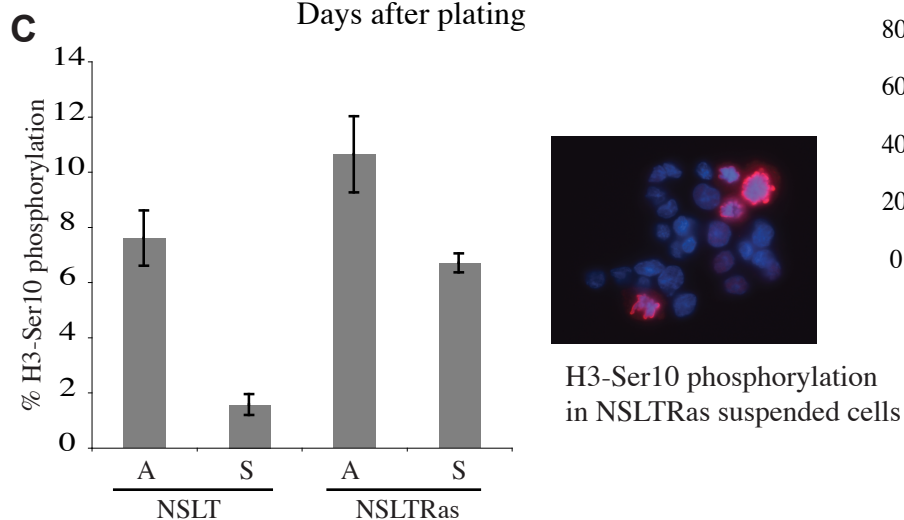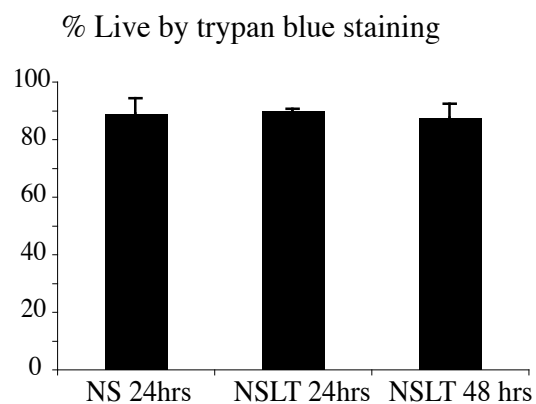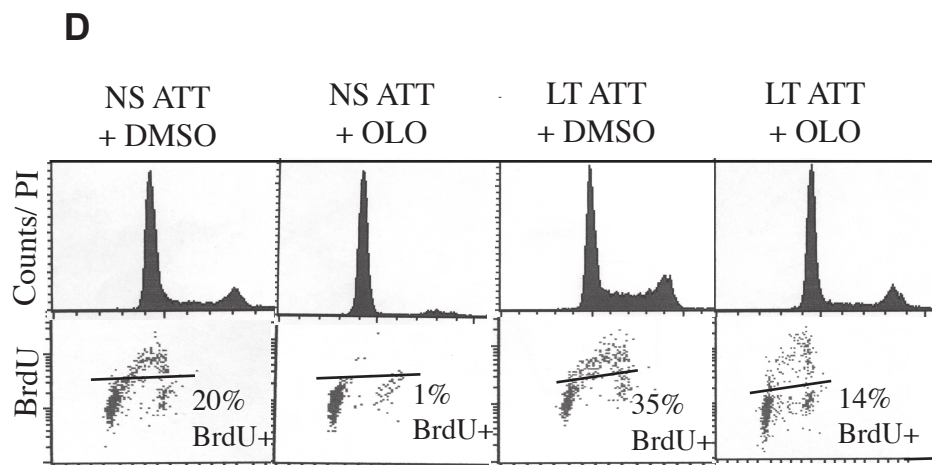

|                | G0/G1 | S(BrdU+) | S(BrdU-) | G2 |
|----------------|-------|----------|----------|----|
| NS ATT (DMSO)  | 73    | 11       | 1        | 15 |
| NS (ATT) (OLO) | 93    | 1        | 1        | 5  |
| LT ATT (DMSO)  | 53    | 23       | 1        | 23 |
| LT ATT (OLO)   | 72    | 5        | 5        | 18 |

Supplement: supp_122_18_3272__1.pdf [file supp_122_18_3272__1.pdf]
